# Supplementary material for: A melanoma subtype with intrinsic resistance to BRAF inhibition identified by receptor tyrosine kinases gene-driven classification
Source: PubMed Central journal article supplement (PMC4467137; doi:10.18632/oncotarget.3007), 2015-01-30
Supplement: oncotarget-06-5118-s001.pdf [file oncotarget-06-5118-s001.pdf]

## SUPPLEMENTARY FIGURES AND TABLES

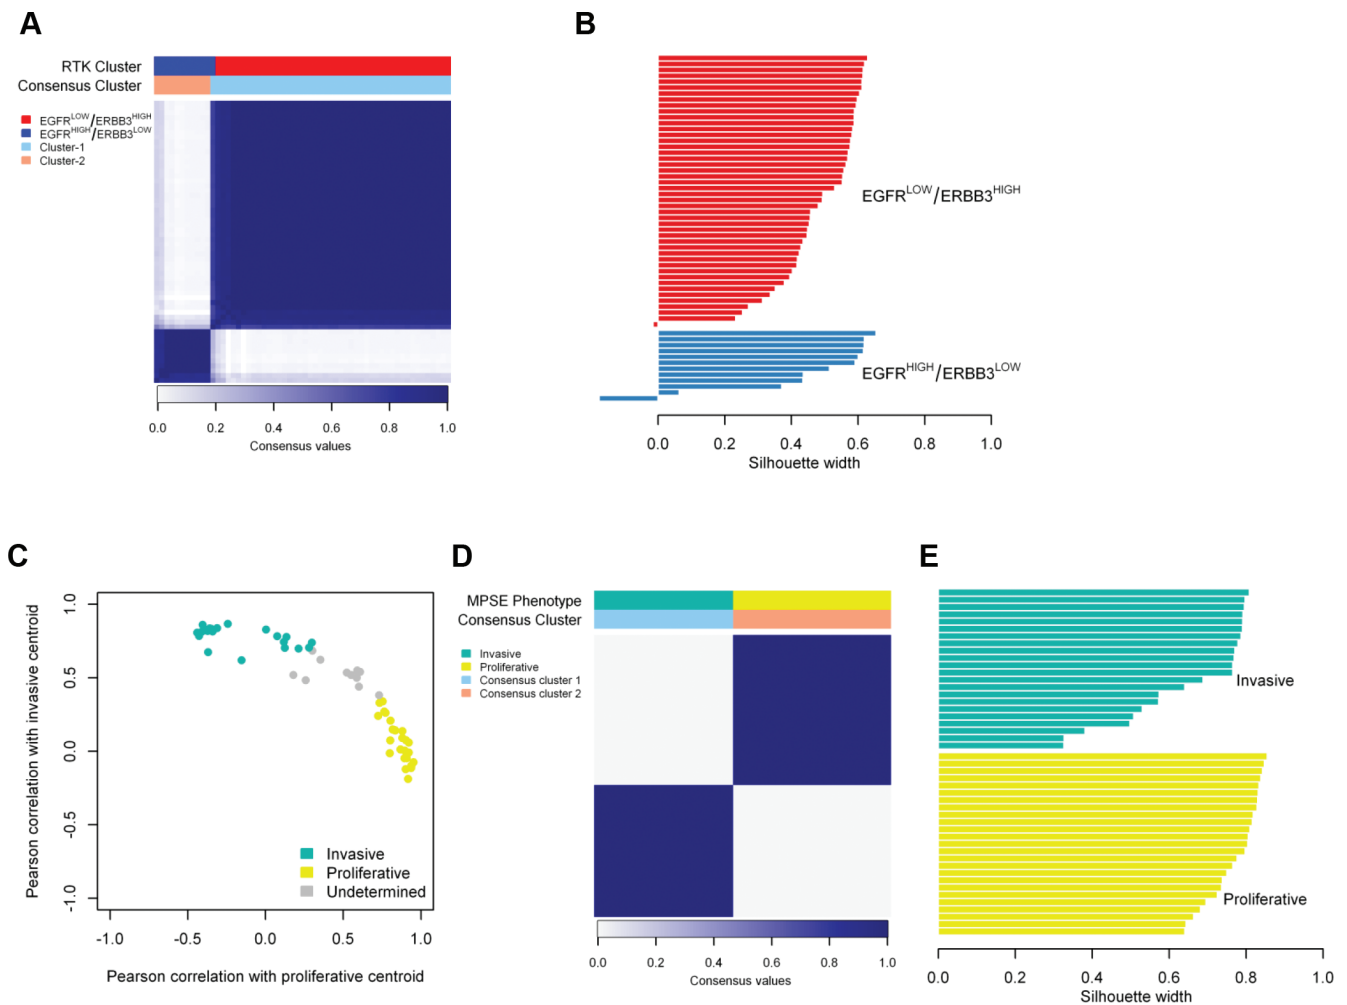

**Supplementary Figure S1: Subtype robustness in melanoma cell lines present in the CCLE dataset.** (A) Consensus clustering using RTK gene expression with the number of clusters fixed at two. The labels assigned by consensus clustering (consensus cluster 1 and 2) are compared to those obtained from hierarchical clustering (EGFR<sup>LOW</sup>/ERBB3<sup>HIGH</sup>) showing high concordance. Only one sample had a different group assignment. (B) Silhouette plot analysis of clusters identified by RTK gene expression. Silhouette width is defined as the ratio of each sample's average distance to samples in the same cluster to the smallest distance to samples not in the same cluster. Samples with a positive silhouette best represent each subtype. (C) Correlation of each sample with the proliferative or invasive centroids, according to MPSE signature. (D) Consensus clustering using the MPSE signature. Labels assigned by consensus clustering and invasive/proliferative phenotype prediction are compared showing perfect concordance. (E) Silhouette plot analysis of clusters identified by MPSE.

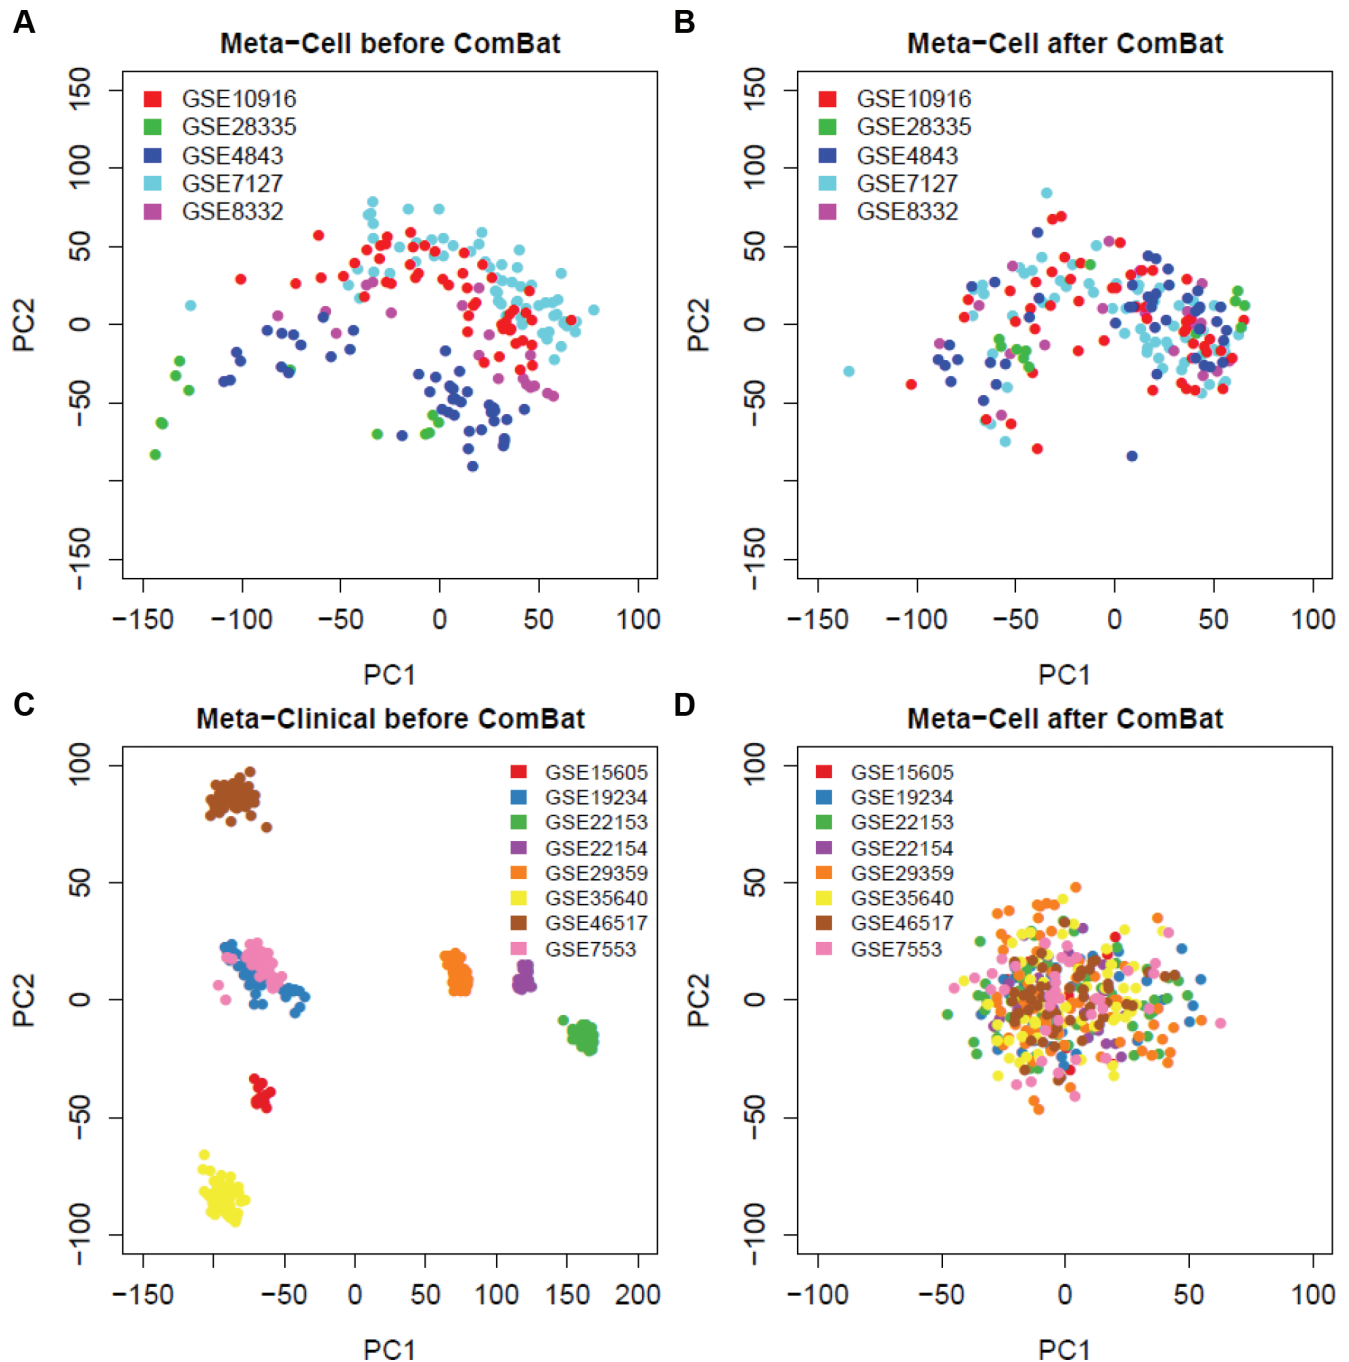

**Supplementary Figure S2: Batch effect removal in Meta-cell and Meta-clinical combined expression microarray datasets.** (A) and (C) Principal component analysis of Meta-Cell (A) and Meta-clinical (C) gene expression data prior to ComBat correction. (B) and (D) After ComBat correction the technical variations were eliminated in both Meta-Cell (B) and Meta-clinical datasets (D). Datasets in Meta-Cell were merged at the probe set level, while Meta-clinical dataset was generated at the gene level due to merging of different microarray platforms.

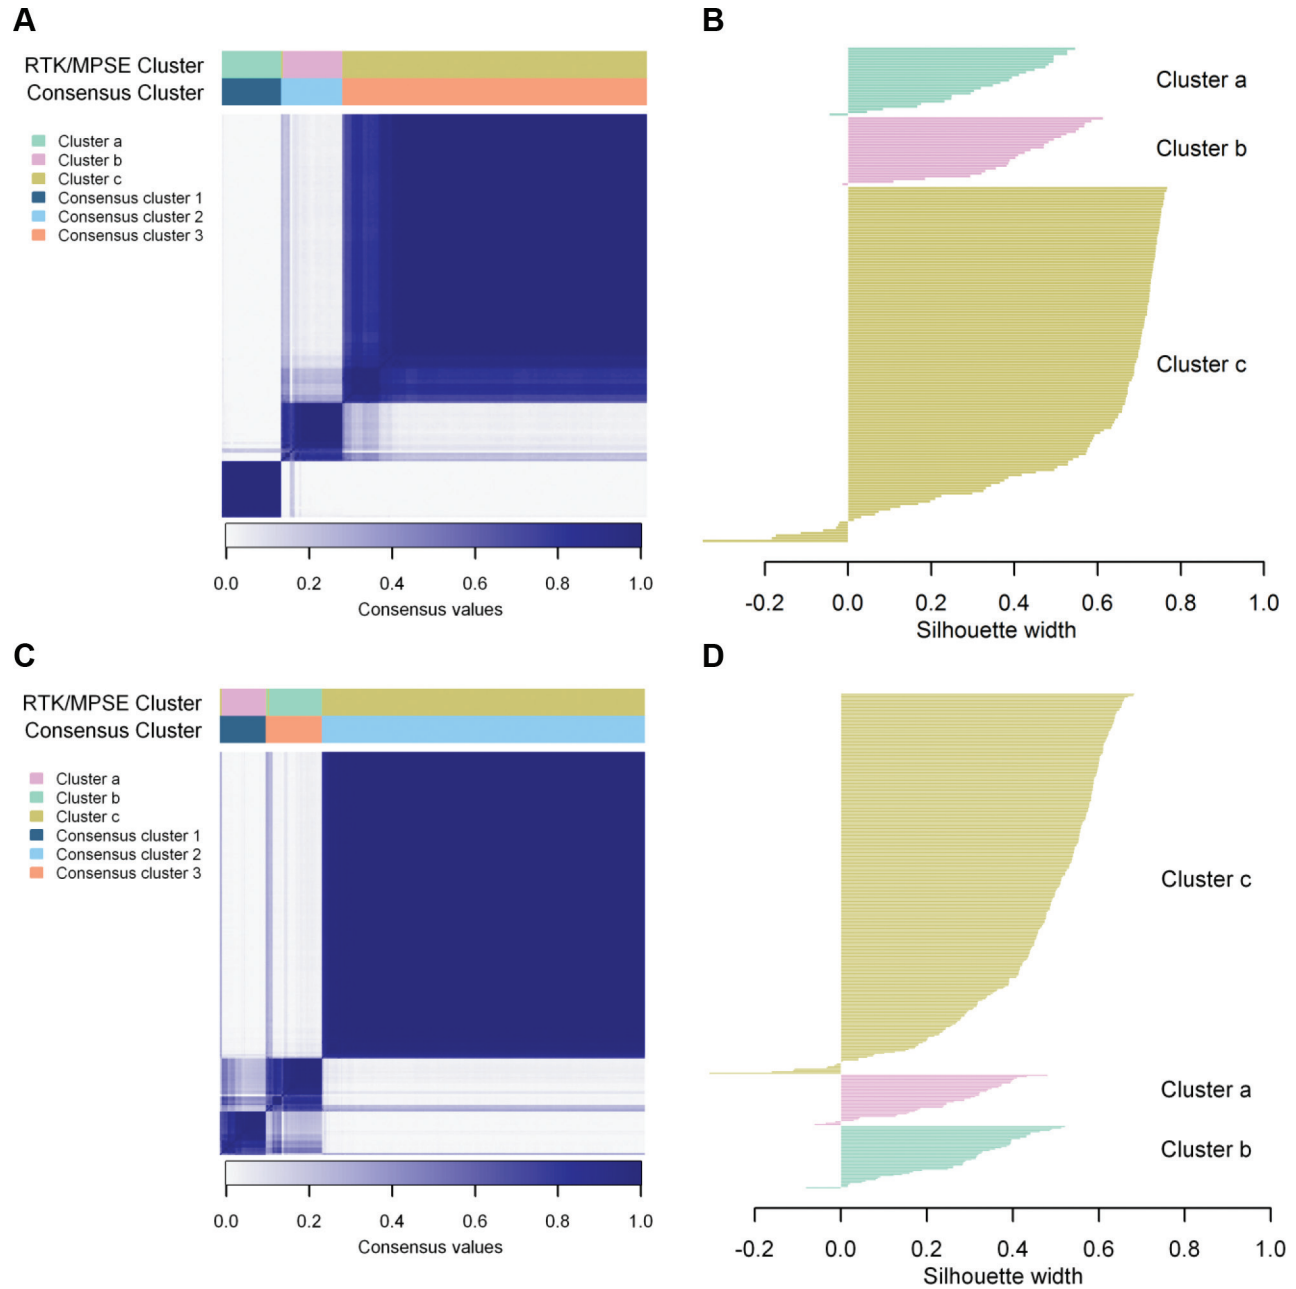

**Supplementary Figure S3: Subtype robustness in Meta-cell and Meta-clinical datasets.** (A) and (C) Consensus hierarchical clustering of Meta-Cell (A) and Meta-Clinical (C) datasets using the RTK/MPSE signature; labels assigned by consensus clustering and hierarchical clustering are compared showing high concordance. (B) and (D) Silhouette plot of clusters identified by RTK/MPSE signature in the Meta-Cell (B) and Meta-Clinical (D) datasets.

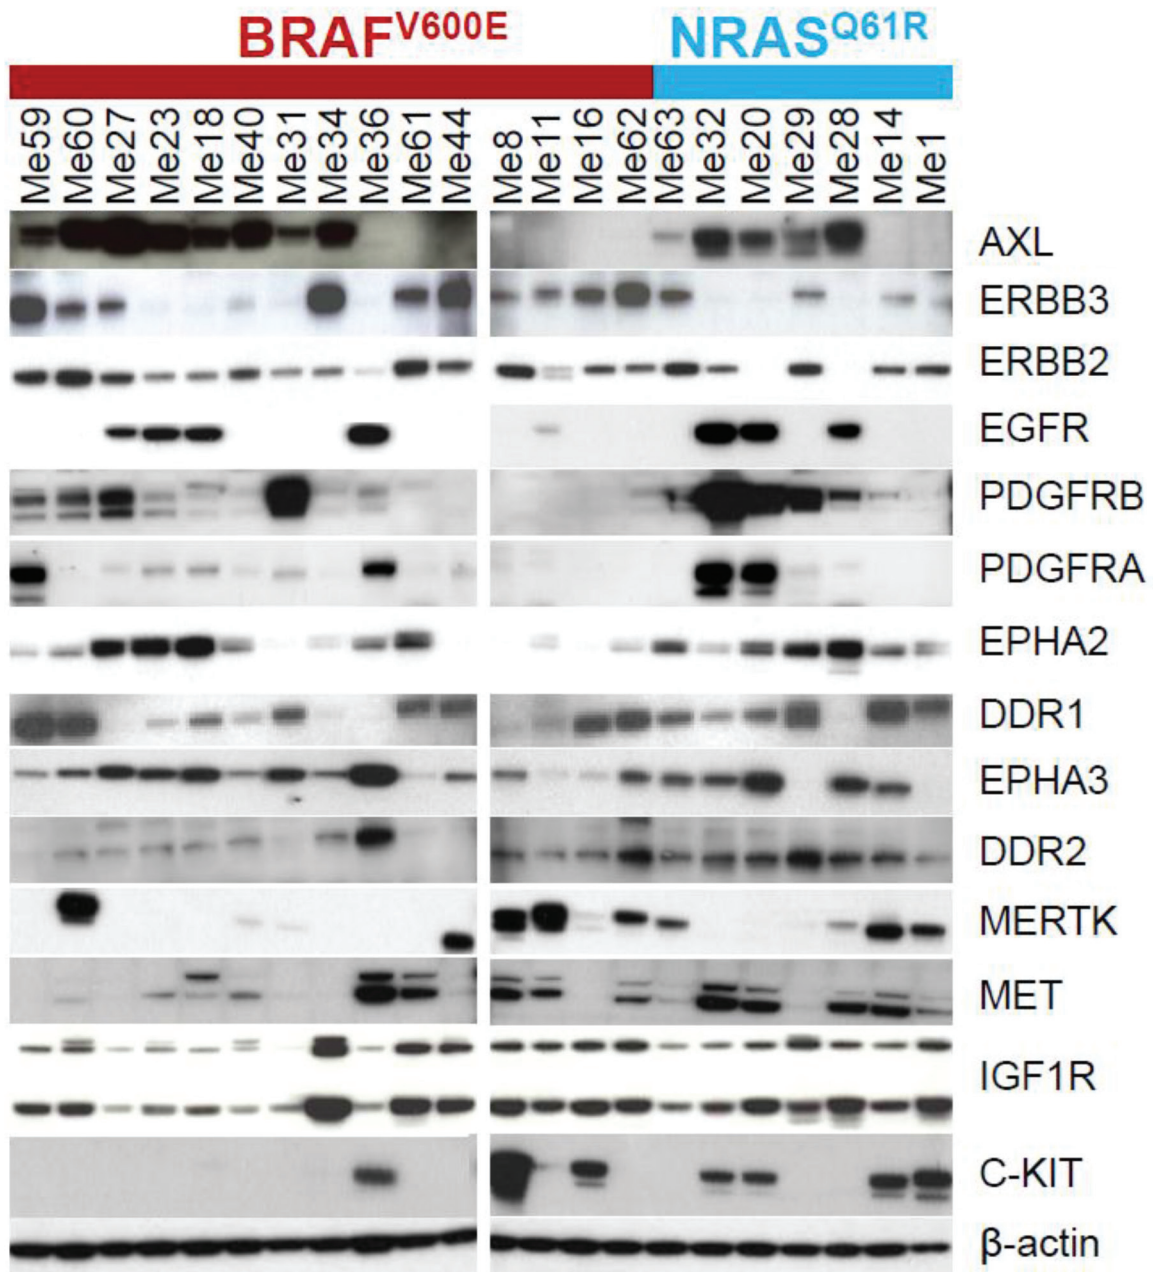

**Supplementary Figure S4: Heterogeneity of RTK expression in melanoma cell lines.** Western blot analyses of 14 RTKs for the panel of 22 melanoma cell lines. The *BRAF* and *NRAS* mutational status is reported. Expression of AXL, ERBB3, EGFR, PDGFRB, PDGFRA, EPHA2, MERTK is also shown in Figure 3B.

**Supplementary Table S1: Samples used in CCLE, Meta-Cell and Meta-Clinical datasets****Supplementary Table S2: Differential expression of genes identified by ClaNC among RTK/MPSE subtypes****Supplementary Table S3: RTK gene expression differences among RTK/MPSE subtypes**

| Symbol | False Discovery Rate (ANOVA) |           |               |
|--------|------------------------------|-----------|---------------|
|        | CCLE                         | Meta-Cell | Meta-Clinical |
| AXL    | 1.25E-09                     | 1.37E-25  | 4.66E-18      |
| DDR2   | 1.39E-02                     | 1.19E-04  | 3.11E-01      |
| EGFR   | 1.22E-11                     | 2.99E-36  | 1.18E-04      |
| EPHA2  | 4.75E-06                     | 1.26E-13  | 5.18E-02      |
| EPHA3  | 4.75E-06                     | 1.19E-04  | 6.23E-07      |
| EPHA4  | 3.47E-01                     | 6.67E-02  | 1.42E-01      |
| EPHA5  | 2.52E-01                     | 5.69E-03  | 1.04E-09      |
| EPHA7  | 9.13E-01                     | 3.16E-03  | 4.43E-01      |
| EPHB1  | 8.47E-05                     | 1.83E-06  | 5.51E-07      |
| ERBB2  | 1.39E-02                     | 2.59E-04  | 4.74E-01      |
| ERBB3  | 2.76E-16                     | 1.84E-31  | 6.81E-34      |
| FGFR1  | 1.02E-04                     | 1.07E-09  | 7.59E-17      |
| FGFR2  | 3.18E-02                     | 2.76E-05  | 1.21E-01      |
| FGFR3  | 1.10E-01                     | 4.26E-05  | 1.41E-01      |
| FGFR4  | 3.42E-03                     | 5.47E-07  | 4.41E-01      |
| FGFRL1 | 1.06E-03                     | 8.94E-14  | NA            |
| FLT1   | 1.84E-02                     | 2.93E-12  | 6.60E-03      |
| IGF1R  | 8.35E-04                     | 3.69E-03  | 1.01E-06      |
| IGF2R  | 3.80E-03                     | 9.33E-03  | 1.50E-01      |
| INSR   | 4.17E-02                     | 7.30E-01  | 9.15E-01      |
| KDR    | 1.65E-02                     | 7.07E-02  | 4.37E-03      |
| KIT    | 3.18E-02                     | 1.68E-03  | 5.39E-12      |
| MERTK  | 4.93E-05                     | 1.86E-10  | 2.42E-02      |
| MET    | 1.78E-02                     | 5.25E-01  | 4.30E-06      |
| NTRK2  | 5.47E-02                     | 1.01E-01  | 1.94E-03      |
| PDGFRA | 4.07E-08                     | 1.44E-20  | 5.07E-12      |
| PDGFRB | 1.87E-07                     | 1.05E-26  | 1.13E-12      |
| PDGFRL | 5.13E-02                     | 8.53E-01  | 1.76E-03      |
| PTK7   | 8.01E-01                     | 2.87E-03  | 3.27E-01      |
| ROR1   | 1.23E-02                     | 6.18E-03  | 3.37E-02      |
| RYK    | 9.82E-01                     | 7.10E-02  | 2.71E-01      |
| STYK1  | 2.26E-02                     | 4.76E-13  | 2.49E-02      |
| TEK    | 1.12E-04                     | 6.18E-13  | 3.17E-04      |
| TYRO3  | 4.32E-05                     | 2.93E-12  | 4.18E-19      |

Supplementary Table S4: Features of melanoma cell lines in the panel<sup>1</sup>

| Cell line Number <sup>1</sup> | Type       | Origin       | BRAF  | NRAS | p53                | PTEN                              | Subtype                                                   |
|-------------------------------|------------|--------------|-------|------|--------------------|-----------------------------------|-----------------------------------------------------------|
| Me18                          | Metastasis | LN           | V600E | wt   | wt                 | Q298Stop <sup>2</sup>             | EGFR <sup>HIGH</sup> /ERBB3 <sup>LOW</sup> _Invasive      |
| Me23                          | Metastasis | LN           | V600E | wt   | wt                 | wt                                | EGFR <sup>HIGH</sup> /ERBB3 <sup>LOW</sup> _Invasive      |
| Me27                          | Metastasis | LN           | V600E | wt   | C135W <sup>2</sup> | wt                                | EGFR <sup>HIGH</sup> /ERBB3 <sup>LOW</sup> _Invasive      |
| Me36                          | Primary    |              | V600E | wt   | wt                 | Del Exon 6,7,8, P89S <sup>2</sup> | EGFR <sup>HIGH</sup> /ERBB3 <sup>LOW</sup> _Invasive      |
| Me20                          | Primary    |              | wt    | Q61R | HD <sup>3</sup>    | wt                                | EGFR <sup>HIGH</sup> /ERBB3 <sup>LOW</sup> _Invasive      |
| Me28                          | Metastasis | SC           | wt    | Q61R | HD <sup>3</sup>    | wt                                | EGFR <sup>HIGH</sup> /ERBB3 <sup>LOW</sup> _Invasive      |
| Me32                          | Metastasis | LN           | wt    | Q61R | Y126H <sup>2</sup> | wt                                | EGFR <sup>HIGH</sup> /ERBB3 <sup>LOW</sup> _Invasive      |
| Me31                          | Metastasis | Lung         | V600E | wt   | wt                 | HD <sup>c</sup>                   | EGFR <sup>LOW</sup> /ERBB3 <sup>HIGH</sup> _Invasive      |
| Me34                          | Metastasis | LN           | V600E | wt   | wt                 | wt                                | EGFR <sup>LOW</sup> /ERBB3 <sup>HIGH</sup> _Invasive      |
| Me40                          | Metastasis | LN           | V600E | wt   | S127F              | P38S                              | EGFR <sup>LOW</sup> /ERBB3 <sup>HIGH</sup> _Invasive      |
| Me59                          | Metastasis | LN           | V600E | wt   | wt                 | wt                                | EGFR <sup>LOW</sup> /ERBB3 <sup>HIGH</sup> _Invasive      |
| Me60                          | Metastasis | SC           | V600E | wt   | wt                 | del403–409 (Exon 5) <sup>2</sup>  | EGFR <sup>LOW</sup> /ERBB3 <sup>HIGH</sup> _Invasive      |
| Me29                          | Metastasis | Fibroadipous | wt    | Q61R | R213R              | wt                                | EGFR <sup>LOW</sup> /ERBB3 <sup>HIGH</sup> _Invasive      |
| Me11                          | Metastasis | LN           | V600E | wt   | wt                 | wt                                | EGFR <sup>LOW</sup> /ERBB3 <sup>HIGH</sup> _Proliferative |
| Me16                          | Metastasis | LN           | V600E | wt   | wt                 | wt                                | EGFR <sup>LOW</sup> /ERBB3 <sup>HIGH</sup> _Proliferative |
| Me44                          | Metastasis | LN           | V600E | wt   | P94L <sup>2</sup>  | R80stop <sup>2</sup>              | EGFR <sup>LOW</sup> /ERBB3 <sup>HIGH</sup> _Proliferative |
| Me61                          | Metastasis | LN           | V600E | wt   | wt                 | wt                                | EGFR <sup>LOW</sup> /ERBB3 <sup>HIGH</sup> _Proliferative |
| Me62                          | Metastasis | LN           | V600E | wt   | wt                 | wt                                | EGFR <sup>LOW</sup> /ERBB3 <sup>HIGH</sup> _Proliferative |
| Me8                           | Metastasis | LN           | V600E | wt   | wt                 | wt                                | EGFR <sup>LOW</sup> /ERBB3 <sup>HIGH</sup> _Proliferative |
| Me1                           | Metastasis | LN           | wt    | Q61R | wt                 | wt                                | EGFR <sup>LOW</sup> /ERBB3 <sup>HIGH</sup> _Proliferative |
| Me14                          | Metastasis | LN           | wt    | Q61R | wt                 | wt                                | EGFR <sup>LOW</sup> /ERBB3 <sup>HIGH</sup> _Proliferative |
| Me63                          | Metastasis | LN           | wt    | Q61R | wt                 | wt                                | EGFR <sup>LOW</sup> /ERBB3 <sup>HIGH</sup> _Proliferative |

<sup>1</sup>All primary and metastatic melanoma cell lines were established *in vitro* from surgical specimens of primary lesions ( $n = 2$ ) or lymph node, subcutaneous or visceral metastases ( $n = 20$ ) removed from patients admitted for surgery to our Institution and not previously treated. Cell lines are numbered according to the list reported in Sensi M. et al. J. Invest. Dermatol. 2011; 131:2448–57. Me59–63 were not included in the previous list. All lesions were histologically confirmed to be cutaneous malignant melanomas.

<sup>2</sup>Homozygous

<sup>3</sup>Homozygous Deletion

**Supplementary Table S5: Effect of all drugs according to RTK/MPSE subtype on CCLE melanoma cell lines**

| Compound     | Targets                                                                     | Company              | False Discover Rate (ANOVA) |                           |
|--------------|-----------------------------------------------------------------------------|----------------------|-----------------------------|---------------------------|
|              |                                                                             |                      | All cell lines <sup>1</sup> | BRAF-V600E/D <sup>1</sup> |
| 17-AAG       | HSP90                                                                       | Bristol-Myers Squibb | 0.798                       | 0.700                     |
| AEW541       | IGF-1R                                                                      | Novartis             | 0.851                       | 0.700                     |
| AZD0530      | Src, Abl/Bcr-Abl, EGFR                                                      | AstraZeneca          | 0.047                       | 0.078                     |
| AZD6244      | MEK                                                                         | AstraZeneca          | 0.023                       | 0.030                     |
| Erlotinib    | EGFR                                                                        | Genentech            | 0.755                       | 0.700                     |
| Irinotecan   | Topoisomerase I                                                             | Pfizer               | 0.755                       | 0.720                     |
| L-685458     | Gamma Secretase                                                             | Merck Sharp & Dohme  | 0.291                       | 0.463                     |
| Lapatinib    | EGFR, HER2                                                                  | GlaxoSmithKline      | 0.755                       | 0.700                     |
| LBW242       | IAP                                                                         | Novartis             | 0.210                       | 0.690                     |
| Nilotinib    | Abl/Bcr-Abl                                                                 | Novartis             | 0.500                       | 0.700                     |
| Nutlin-3     | MDM2                                                                        | Roche                | 0.798                       | 0.720                     |
| Paclitaxel   | beta-tubulin                                                                | Bristol-Myers Squibb | 0.488                       | 0.700                     |
| Panobinostat | HDAC                                                                        | Novartis             | 0.488                       | 0.308                     |
| PD-0325901   | MEK                                                                         | Pfizer               | 0.328                       | 0.030                     |
| PD-0332991   | CDK4/6                                                                      | Pfizer               | 0.133                       | 0.700                     |
| PF2341066    | c-MET, ALK                                                                  | Pfizer               | 0.133                       | 0.700                     |
| PHA-665752   | c-MET                                                                       | Pfizer               | 0.798                       | 0.700                     |
| PLX4720      | RAF                                                                         | Plexxikon            | 0.076                       | 0.001                     |
| RAF265       | Raf kinase B, KDR                                                           | Novartis             | 0.755                       | 0.391                     |
| Sorafenib    | Flt3, C-KIT, PDGFRbeta, RET, Raf kinase B, Raf kinase C, VEGFR-1, KDR, FLT4 | Bayer                | 0.667                       | 0.700                     |
| TAE684       | ALK                                                                         | Novartis             | 0.023                       | 0.307                     |
| TKI258       | EGFR, FGFR1, PDGFRbeta, VEGFR-1, KDR                                        | Novartis             | 0.798                       | 0.720                     |
| Topotecan    | Topoisomerase I                                                             | GlaxoSmithKline      | 0.798                       | 0.700                     |
| ZD-6474      | EGFR                                                                        | AstraZeneca          | 0.798                       | 0.873                     |

<sup>1</sup>For each drug the number of cells tested is different. Considering all samples, the number of cell lines used in the analyses goes from a minimum of 21 to a maximum of 28. Considering only samples with a BRAFV600 mutation, the number of cells lines goes from a minimum of 13 to a maximum of 19.

**Supplementary Table S6: Information of patients and of melanoma specimens used in immunohistochemical analysis**

**Supplementary Table S7: Antibodies used in the study**

| Antigen protein | Type                                     | Company                            | Application <sup>1</sup> |
|-----------------|------------------------------------------|------------------------------------|--------------------------|
| AKT             | polyclonal (C-terminus) rabbit           | Cell Signaling (9272)              | IB                       |
| AKT-S473        | monoclonal rabbit                        | Cell Signaling (4060)              | IB                       |
| AXL             | polyclonal (C-terminus) goat             | Santa Cruz Biotechnology (sc-1096) | IB                       |
| AXL             | polyclonal (extracellular domain) goat   | R&D Systems (AF154)                | IHC                      |
| AXL-Y702        | monoclonal rabbit                        | Cell Signaling (5724)              | IB                       |
| c-KIT           | polyclonal(C-terminus) rabbit            | Dako (A4502)                       | IB                       |
| DDR1            | monoclonal rabbit                        | Cell Signaling (5583)              | IB                       |
| DDR2            | polyclonal (N-terminus)                  | Santa Cruz Biotechnology (sc-7555) | IB                       |
| EGFR            | monoclonal (cytoplasmatic domain) rabbit | Cell Signaling (4267)              | IB, IHC                  |
| EGFR-Y1068      | monoclonal rabbit                        | Cell Signaling (3777)              | IB                       |
| EPHA2           | polyclonal (C-terminus) rabbit           | Santa Cruz Biotechnology (sc-924)  | IB                       |
| EPHA2-Y588      | monoclonal rabbit                        | Cell Signaling (12677)             | IB                       |
| EPHA3           | polyclonal (C-terminus) rabbit           | Santa Cruz Biotechnology (sc-919)  | IB                       |
| ERBB2           | monoclonal rabbit                        | Cell Signaling (4290)              | IB                       |
| ERBB3           | monoclonal (C-terminus) mouse            | Santa Cruz Biotechnology (sc-7390) | IB                       |
| ERBB3-Y1289     | monoclonal rabbit                        | Cell Signaling (4791)              | IB                       |
| ERK             | polyclonal rabbit                        | Promega (V1141)                    | IB                       |
| ERK-T183/Y185   | monoclonal mouse                         | Sigma-Aldrich (M8159)              | IB                       |
| FAK             | polyclonal (N-terminus) rabbit           | Santa Cruz Biotechnology (sc-557)  | IB                       |
| FAK-Y925        | polyclonal rabbit                        | Cell Signaling (3284)              | IB                       |
| FGFR1           | monoclonal (C-terminus) rabbit           | Cell Signaling (9740)              | IB                       |
| IGF1R           | monoclonal (C-terminus) rabbit           | Cell Signaling (9750)              | IB                       |
| MERTK           | monoclonal (extracellular domain) mouse  | Cell Signaling (9178)              | IB                       |
| MET             | monoclonal mouse                         | Cell Signaling (3127)              | IB                       |
| MITF            | monoclonal mouse                         | Dako (M3621)                       | IB, IHC                  |
| Paxillin-Y118   | polyclonal rabbit                        | Invitrogen (44-722)                | IB                       |
| PDGFRA          | monoclonal (extracellular domain) rabbit | Cell Signaling (5241)              | IB                       |
| PDGFRB          | polyclonal rabbit                        | Santa Cruz Biotechnology (sc-432)  | IB                       |
| PDGFRB-Y571     | monoclonal rabbit                        | Cell Signaling (4549)              | IB                       |
| S6              | monoclonal mouse                         | Cell Signaling (2317)              | IB                       |
| S100            | polyclonal rabbit                        | Dako (Z0311)                       | IHC                      |
| S6-S235/236     | monoclonal rabbit                        | Cell Signaling (4858)              | IB                       |
| S6-S240/244     | monoclonal rabbit                        | Cell Signaling (5364)              | IB                       |
| SRC-Y416        | polyclonal rabbit                        | Cell Signaling (2101)              | IB                       |
| β-actin         | polyclonal (C-terminus) rabbit           | Sigma-Aldrich (A2066)              | IB                       |

<sup>1</sup>IB, immunoblotting; IHC, immunohistochemistry
